# Supplementary figures and images for: Diagnostic accuracy of subjective dyspnoea in detecting hypoxaemia among outpatients with COVID-19: a retrospective cohort study
Source: HighWire-hosted journal article supplement (doi:10.1136/bmjopen-2020-046282), 2021-03-01

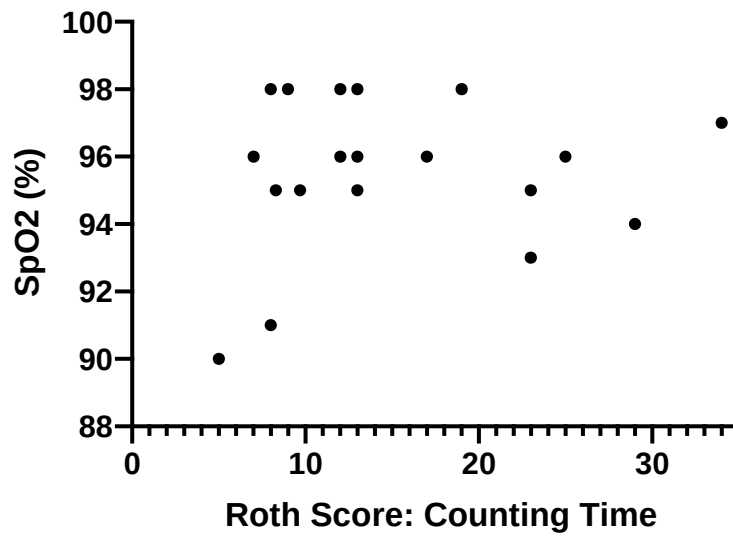

**Figure S2. Scatter Plot of SpO2 values across patients' Roth Scores (Counting T**

Supplement: bmjopen-2020-046282supp002_data_supplement.pdf [file bmjopen-2020-046282supp002_data_supplement.pdf]
